# Supplementary material for: High SPIN4 Expression Is Linked to Advanced Nodal Status and Inferior Prognosis in Nasopharyngeal Carcinoma Patients
Source: MDPI journal article supplement (doi:10.3390/life11090912), 2021-09-01
Supplement: s1 [file s1]

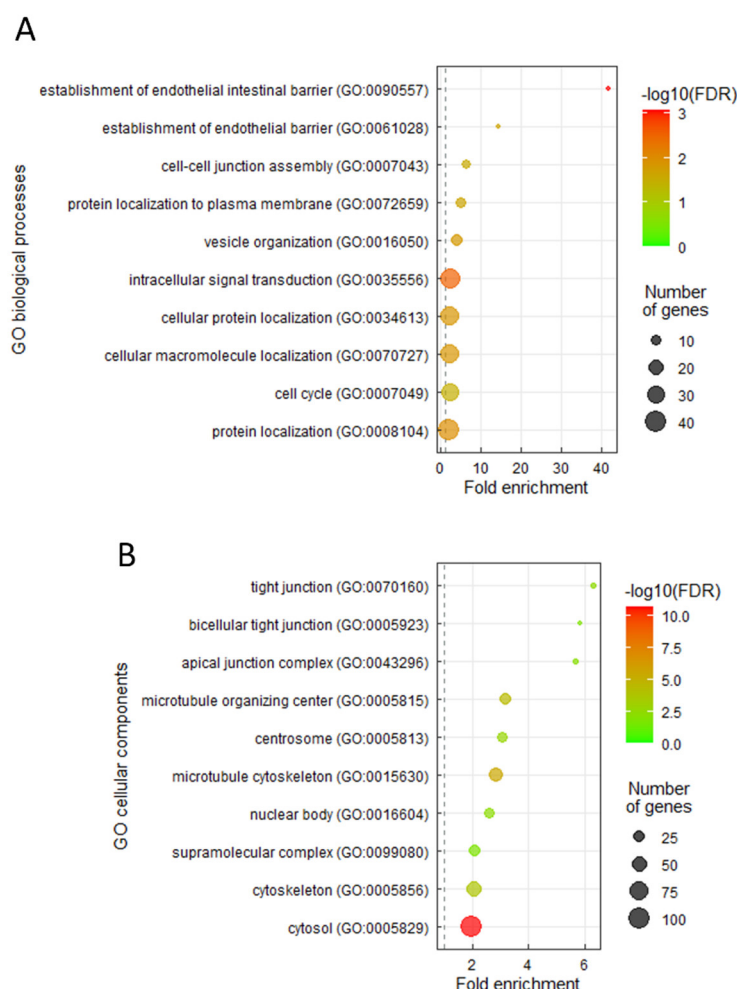

**Figure S1.** The top 10 biological process or cellular component terms enriched in *SPIN4* upregulation. The genes that were coexpressed with *SPIN4* in NPC from the TCGA database ( $n = 523$ ) were analyzed using the cBioPortal online platform. The genes (top 200 transcripts) with positive associations were further analyzed using the PANTHER classification system in accordance with (A) biological processes or (B) cellular components and were rated by *fold enrichment* for functional annotation.

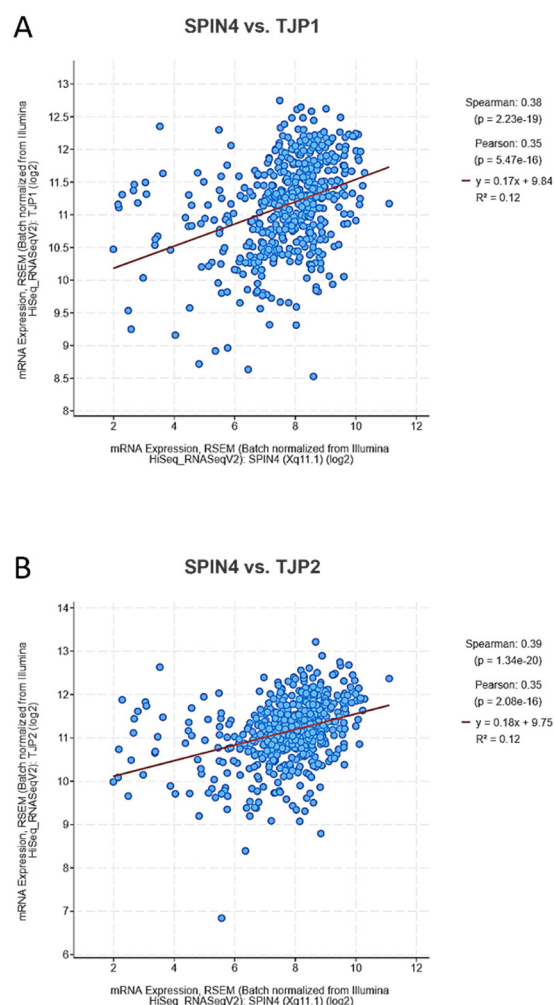

**Figure S2.** Associations among the expression levels of *SPIN4*, *TJP1*, and *TJP2*. The data were exported from the TCGA database (n = 523) using the cBioPortal online platform.

**Table S1.** The top 200 genes positively correlated with *SPIN4*.

| Correlated Gene | Cytoband | Spearman's Correlation | p-Value  | q-Value  |
|-----------------|----------|------------------------|----------|----------|
| RAB27B          | 18q21.2  | 0.474                  | 3.05E-30 | 6.11E-26 |
| IRAK2           | 3p25.3   | 0.468                  | 2.08E-29 | 2.08E-25 |
| PDCD6IP         | 3p22.3   | 0.442                  | 5.43E-26 | 2.18E-22 |
| FCHO2           | 5q13.2   | 0.438                  | 1.32E-25 | 3.78E-22 |
| TAB3            | Xp21.2   | 0.433                  | 6.67E-25 | 1.34E-21 |
| EPS15           | 1p32.3   | 0.425                  | 5.24E-24 | 9.55E-21 |
| ADGRG6          | 6q24.2   | 0.423                  | 9.65E-24 | 1.61E-20 |
| PKN2            | 1p22.2   | 0.421                  | 1.37E-23 | 2.11E-20 |
| CLASP2          | 3p22.3   | 0.42                   | 1.86E-23 | 2.67E-20 |
| MIER1           | 1p31.3   | 0.419                  | 2.90E-23 | 3.75E-20 |
| SLMAP           | 3p14.3   | 0.418                  | 3.00E-23 | 3.75E-20 |
| GNG12           | 1p31.3   | 0.417                  | 4.84E-23 | 5.71E-20 |
| PTAFR           | 1p35.3   | 0.415                  | 6.73E-23 | 7.49E-20 |
| ITSN2           | 2p23.3   | 0.414                  | 1.02E-22 | 1.03E-19 |
| SLC25A24        | 1p13.3   | 0.412                  | 1.48E-22 | 1.41E-19 |
| ANKRD13C        | 1p31.1   | 0.41                   | 2.65E-22 | 2.31E-19 |
| CRYBG1          | 6q21     | 0.409                  | 3.09E-22 | 2.48E-19 |

|                |                |       |          |                 |
|----------------|----------------|-------|----------|-----------------|
| <b>TMOD3</b>   | 15q21.2        | 0.409 | 3.23E-22 | <b>2.49E-19</b> |
| <b>MORC3</b>   | 21q22.12       | 0.406 | 6.97E-22 | <b>4.66E-19</b> |
| <b>TRIM33</b>  | 1p13.2         | 0.403 | 1.51E-21 | <b>9.15E-19</b> |
| <b>SLK</b>     | 10q24.33-q25.1 | 0.402 | 1.97E-21 | <b>1.16E-18</b> |
| <b>ERI1</b>    | 8p23.1         | 0.399 | 4.39E-21 | <b>2.44E-18</b> |
| <b>BMP2K</b>   | 4q21.21        | 0.398 | 5.11E-21 | <b>2.69E-18</b> |
| <b>USP53</b>   | 4q26           | 0.397 | 6.52E-21 | <b>3.35E-18</b> |
| <b>OXSR1</b>   | 3p22.2         | 0.397 | 7.56E-21 | <b>3.70E-18</b> |
| <b>PDS5A</b>   | 4p14           | 0.396 | 9.40E-21 | <b>4.49E-18</b> |
| <b>TJP2</b>    | 9q21.11        | 0.394 | 1.34E-20 | <b>6.09E-18</b> |
| <b>GSTCD</b>   | 4q24           | 0.394 | 1.38E-20 | <b>6.14E-18</b> |
| <b>PI4K2B</b>  | 4p15.2         | 0.393 | 1.62E-20 | <b>7.05E-18</b> |
| <b>UGCG</b>    | 9q31.3         | 0.392 | 2.30E-20 | <b>9.59E-18</b> |
| <b>RAP2C</b>   | Xq26.2         | 0.39  | 3.53E-20 | <b>1.39E-17</b> |
| <b>AMPD3</b>   | 11p15.4        | 0.39  | 3.76E-20 | <b>1.45E-17</b> |
| <b>TAOK3</b>   | 12q24.23       | 0.389 | 4.33E-20 | <b>1.64E-17</b> |
| <b>MAST4</b>   | 5q12.3         | 0.386 | 9.79E-20 | <b>3.38E-17</b> |
| <b>ABCD3</b>   | 1p21.3         | 0.385 | 1.26E-19 | <b>4.00E-17</b> |
| <b>CLOCK</b>   | 4q12           | 0.384 | 1.58E-19 | <b>4.96E-17</b> |
| <b>CHM</b>     | Xq21.2         | 0.383 | 1.96E-19 | <b>6.05E-17</b> |
| <b>TJP1</b>    | 15q13.1        | 0.382 | 2.23E-19 | <b>6.67E-17</b> |
| <b>OTUD4</b>   | 4q31.21        | 0.382 | 2.52E-19 | <b>7.42E-17</b> |
| <b>KBTBD8</b>  | 3p14.1         | 0.381 | 2.98E-19 | <b>8.18E-17</b> |
| <b>CCDC186</b> | 10q25.3        | 0.381 | 2.98E-19 | <b>8.18E-17</b> |
| <b>BACH1</b>   | 21q21.3        | 0.38  | 3.79E-19 | <b>1.03E-16</b> |
| <b>DDX3X</b>   | Xp11.4         | 0.379 | 4.61E-19 | <b>1.22E-16</b> |
| <b>DHX15</b>   | 4p15.2         | 0.379 | 4.87E-19 | <b>1.27E-16</b> |
| <b>MTF1</b>    | 1p34.3         | 0.379 | 5.28E-19 | <b>1.36E-16</b> |
| <b>ZFYVE16</b> | 5q14.1         | 0.378 | 5.99E-19 | <b>1.52E-16</b> |
| <b>LTN1</b>    | 21q21.3        | 0.378 | 6.43E-19 | <b>1.59E-16</b> |
| <b>EEA1</b>    | 12q22          | 0.377 | 7.22E-19 | <b>1.76E-16</b> |
| <b>ARHGEF3</b> | 3p14.3         | 0.377 | 7.92E-19 | <b>1.89E-16</b> |
| <b>NRAS</b>    | 1p13.2         | 0.375 | 1.24E-18 | <b>2.77E-16</b> |
| <b>FAM199X</b> | Xq22.2         | 0.373 | 1.96E-18 | <b>4.27E-16</b> |
| <b>NIPAL1</b>  | 4p12           | 0.372 | 2.67E-18 | <b>5.70E-16</b> |
| <b>RREB1</b>   | 6p24.3         | 0.369 | 4.24E-18 | <b>8.34E-16</b> |
| <b>MBNL3</b>   | Xq26.2         | 0.369 | 4.40E-18 | <b>8.52E-16</b> |
| <b>FRYL</b>    | 4p11           | 0.368 | 6.37E-18 | <b>1.20E-15</b> |
| <b>RBM41</b>   | Xq22.3         | 0.368 | 6.39E-18 | <b>1.20E-15</b> |
| <b>LIG4</b>    | 13q33.3        | 0.367 | 6.58E-18 | <b>1.22E-15</b> |
| <b>FAM126B</b> | 2q33.1         | 0.366 | 8.27E-18 | <b>1.52E-15</b> |
| <b>VPS4B</b>   | 18q21.33       | 0.366 | 8.77E-18 | <b>1.58E-15</b> |
| <b>USP33</b>   | 1p31.1         | 0.365 | 1.05E-17 | <b>1.88E-15</b> |
| <b>MED14</b>   | Xp11.4         | 0.365 | 1.07E-17 | <b>1.89E-15</b> |
| <b>CPEB3</b>   | 10q23.32       | 0.365 | 1.18E-17 | <b>2.07E-15</b> |
| <b>PGM2</b>    | 4p14           | 0.364 | 1.40E-17 | <b>2.42E-15</b> |
| <b>SEC24B</b>  | 4q25           | 0.364 | 1.43E-17 | <b>2.46E-15</b> |
| <b>FER</b>     | 5q21.3         | 0.364 | 1.49E-17 | <b>2.53E-15</b> |
| <b>EHF</b>     | 11p13          | 0.363 | 1.65E-17 | <b>2.75E-15</b> |
| <b>PTPN13</b>  | 4q21.3         | 0.363 | 1.66E-17 | <b>2.75E-15</b> |
| <b>EPG5</b>    | 18q12.3-q21.1  | 0.362 | 1.98E-17 | <b>3.21E-15</b> |

|          |                |       |          |          |
|----------|----------------|-------|----------|----------|
| CRLF3    | 17q11.2        | 0.362 | 2.07E-17 | 3.27E-15 |
| WDR44    | Xq24           | 0.361 | 2.91E-17 | 4.33E-15 |
| GMEB1    | 1p35.3         | 0.36  | 3.10E-17 | 4.46E-15 |
| PKP2     | 12p11.21       | 0.36  | 3.18E-17 | 4.56E-15 |
| HIPK1    | 1p13.2         | 0.36  | 3.31E-17 | 4.70E-15 |
| ITPR2    | 12p11.23       | 0.36  | 3.40E-17 | 4.80E-15 |
| RAD18    | 3p25.3         | 0.36  | 3.59E-17 | 5.00E-15 |
| CD2AP    | 6p12.3         | 0.359 | 4.03E-17 | 5.53E-15 |
| CNOT6    | 5q35.3         | 0.359 | 4.45E-17 | 6.03E-15 |
| MPP5     | 14q23.3        | 0.359 | 4.59E-17 | 6.14E-15 |
| PRKAR2A  | 3p21.31        | 0.358 | 4.75E-17 | 6.31E-15 |
| GCOM1    | 15q21.3        | 0.358 | 5.10E-17 | 6.73E-15 |
| NCOA4    | 10q11.22       | 0.358 | 5.38E-17 | 7.01E-15 |
| MBP      | 18q23          | 0.357 | 6.60E-17 | 8.38E-15 |
| DMXL1    | 5q23.1         | 0.357 | 6.70E-17 | 8.45E-15 |
| STK4     | 20q13.12       | 0.356 | 7.46E-17 | 9.34E-15 |
| OSBPL8   | 12q21.2        | 0.356 | 7.50E-17 | 9.34E-15 |
| STRN     | 2p22.2         | 0.356 | 7.71E-17 | 9.55E-15 |
| EAF1     | 3p25.1         | 0.356 | 8.03E-17 | 9.88E-15 |
| C18ORF25 | 18q21.1        | 0.356 | 8.47E-17 | 1.03E-14 |
| TASOR    | 3p14.3         | 0.355 | 8.95E-17 | 1.08E-14 |
| SERPINB2 | 18q21.33-q22.1 | 0.355 | 9.64E-17 | 1.14E-14 |
| USP24    | 1p32.3         | 0.354 | 1.09E-16 | 1.27E-14 |
| ATXN7    | 3p14.1         | 0.353 | 1.39E-16 | 1.55E-14 |
| SGMS2    | 4q25           | 0.353 | 1.44E-16 | 1.59E-14 |
| ELOVL7   | 5q12.1         | 0.353 | 1.50E-16 | 1.66E-14 |
| TNKS2    | 10q23.32       | 0.353 | 1.54E-16 | 1.69E-14 |
| MINDY2   | 15q21.3-q22.1  | 0.352 | 1.70E-16 | 1.83E-14 |
| CMTR2    | 16q22.2        | 0.352 | 1.89E-16 | 2.02E-14 |
| KIF20B   | 10q23.31       | 0.351 | 2.03E-16 | 2.17E-14 |
| RASSF3   | 12q14.2        | 0.351 | 2.17E-16 | 2.30E-14 |
| USP38    | 4q31.21        | 0.351 | 2.48E-16 | 2.58E-14 |
| HNRNPF   | 10q11.21       | 0.35  | 2.53E-16 | 2.62E-14 |
| KAT2B    | 3p24.3         | 0.349 | 3.12E-16 | 3.13E-14 |
| MTM1     | Xq28           | 0.349 | 3.17E-16 | 3.17E-14 |
| MBLAC2   | 5q14.3         | 0.349 | 3.67E-16 | 3.57E-14 |
| NFKB1    | 4q24           | 0.348 | 3.84E-16 | 3.68E-14 |
| LRRC40   | 1p31.1         | 0.348 | 3.84E-16 | 3.68E-14 |
| NBPF10   | 1q21.1         | 0.348 | 4.03E-16 | 3.84E-14 |
| PHACTR2  | 6q24.2         | 0.348 | 4.08E-16 | 3.84E-14 |
| SERPINB8 | 18q22.1        | 0.347 | 4.65E-16 | 4.31E-14 |
| GOLGA4   | 3p22.2         | 0.347 | 4.93E-16 | 4.53E-14 |
| GPSM2    | 1p13.3         | 0.346 | 6.24E-16 | 5.63E-14 |
| BDP1     | 5q13.2         | 0.345 | 6.98E-16 | 6.25E-14 |
| DENND2C  | 1p13.2         | 0.345 | 7.50E-16 | 6.65E-14 |
| SMC1A    | Xp11.22        | 0.345 | 7.84E-16 | 6.89E-14 |
| SLC28A3  | 9q21.32-q21.33 | 0.345 | 8.02E-16 | 7.02E-14 |
| PRR11    | 17q22          | 0.344 | 8.70E-16 | 7.55E-14 |
| HIVEP1   | 6p24.1         | 0.344 | 8.84E-16 | 7.64E-14 |
| DENND4C  | 9p22.1         | 0.344 | 9.82E-16 | 8.45E-14 |
| MYD88    | 3p22.2         | 0.343 | 1.04E-15 | 8.86E-14 |

|           |          |       |          |          |
|-----------|----------|-------|----------|----------|
| DDI2      | 1p36.21  | 0.343 | 1.04E-15 | 8.86E-14 |
| CARNMT1   | 9q21.13  | 0.343 | 1.16E-15 | 9.70E-14 |
| LYSMD3    | 5q14.3   | 0.343 | 1.16E-15 | 9.70E-14 |
| CTTNBP2NL | 1p13.2   | 0.343 | 1.19E-15 | 9.98E-14 |
| EYA3      | 1p35.3   | 0.343 | 1.21E-15 | 1.01E-13 |
| POLR3A    | 10q22.3  | 0.343 | 1.25E-15 | 1.02E-13 |
| PBRM1     | 3p21.1   | 0.342 | 1.29E-15 | 1.04E-13 |
| DENND6A   | 3p14.3   | 0.341 | 1.65E-15 | 1.30E-13 |
| C12ORF29  | 12q21.32 | 0.341 | 1.67E-15 | 1.31E-13 |
| YTHDC2    | 5q22.2   | 0.341 | 1.67E-15 | 1.31E-13 |
| RSC1A1    | 1p36.21  | 0.34  | 1.92E-15 | 1.49E-13 |
| GORASP1   | 3p22.2   | 0.339 | 2.39E-15 | 1.82E-13 |
| RASA1     | 5q14.3   | 0.339 | 2.53E-15 | 1.90E-13 |
| FOXP2     | 2p16.3   | 0.339 | 2.53E-15 | 1.90E-13 |
| DOCK9     | 13q32.3  | 0.339 | 2.67E-15 | 2.00E-13 |
| VPS13A    | 9q21.2   | 0.338 | 2.86E-15 | 2.13E-13 |
| STXB3     | 1p13.3   | 0.338 | 3.06E-15 | 2.27E-13 |
| MALT1     | 18q21.32 | 0.338 | 3.09E-15 | 2.29E-13 |
| MICALCL   | 11p15.3  | 0.338 | 3.12E-15 | 2.30E-13 |
| KIF2A     | 5q12.1   | 0.338 | 3.21E-15 | 2.35E-13 |
| SYNJ1     | 21q22.11 | 0.337 | 3.52E-15 | 2.58E-13 |
| PTBP3     | 9q32     | 0.337 | 3.99E-15 | 2.86E-13 |
| AQR       | 15q14    | 0.337 | 4.07E-15 | 2.90E-13 |
| ASCC3     | 6q16.3   | 0.337 | 4.15E-15 | 2.93E-13 |
| RNF144B   | 6p22.3   | 0.336 | 4.50E-15 | 3.13E-13 |
| TTC37     | 5q15     | 0.336 | 4.77E-15 | 3.29E-13 |
| PATL1     | 11q12.1  | 0.336 | 5.10E-15 | 3.50E-13 |
| GABPA     | 21q21.3  | 0.335 | 5.66E-15 | 3.86E-13 |
| METTL14   | 4q26     | 0.335 | 5.90E-15 | 4.00E-13 |
| APAF1     | 12q23.1  | 0.335 | 5.90E-15 | 4.00E-13 |
| PDE12     | 3p14.3   | 0.335 | 6.22E-15 | 4.18E-13 |
| SLC38A1   | 12q13.11 | 0.334 | 6.91E-15 | 4.60E-13 |
| RP2       | Xp11.3   | 0.334 | 7.08E-15 | 4.68E-13 |
| ARAP2     | 4p14     | 0.333 | 8.31E-15 | 5.31E-13 |
| DIP2A     | 21q22.3  | 0.333 | 8.49E-15 | 5.39E-13 |
| FBXO3     | 11p13    | 0.333 | 8.50E-15 | 5.39E-13 |
| HERC3     | 4q22.1   | 0.333 | 8.99E-15 | 5.69E-13 |
| NDFIP2    | 13q31.1  | 0.333 | 9.20E-15 | 5.79E-13 |
| CAB39     | 2q37.1   | 0.331 | 1.18E-14 | 7.35E-13 |
| FMR1      | Xq27.3   | 0.331 | 1.20E-14 | 7.46E-13 |
| EPB41L5   | 2q14.2   | 0.331 | 1.23E-14 | 7.61E-13 |
| EIF3A     | 10q26.11 | 0.331 | 1.25E-14 | 7.67E-13 |
| RCAN3     | 1p36.11  | 0.33  | 1.38E-14 | 8.40E-13 |
| MYO18A    | 17q11.2  | 0.33  | 1.41E-14 | 8.54E-13 |
| CLSPN     | 1p34.3   | 0.33  | 1.43E-14 | 8.59E-13 |
| NCOA2     | 8q13.3   | 0.33  | 1.65E-14 | 9.89E-13 |
| SLC4A7    | 3p24.1   | 0.329 | 1.70E-14 | 1.01E-12 |
| APPL1     | 3p14.3   | 0.329 | 1.88E-14 | 1.11E-12 |
| HS3ST1    | 4p15.33  | 0.329 | 1.88E-14 | 1.11E-12 |
| GAS2L3    | 12q23.1  | 0.329 | 1.96E-14 | 1.15E-12 |
| BRWD3     | Xq21.1   | 0.328 | 2.25E-14 | 1.31E-12 |

|          |            |       |          |          |
|----------|------------|-------|----------|----------|
| KIF13B   | 8p12       | 0.328 | 2.35E-14 | 1.36E-12 |
| NEK7     | 1q31.3     | 0.328 | 2.35E-14 | 1.36E-12 |
| RIC1     | 9p24.1     | 0.327 | 2.57E-14 | 1.48E-12 |
| CCDC15   | 11q24.2    | 0.327 | 2.57E-14 | 1.48E-12 |
| CREB1    | 2q33.3     | 0.327 | 2.66E-14 | 1.53E-12 |
| ARNTL2   | 12p11.23   | 0.327 | 2.74E-14 | 1.56E-12 |
| CAPZA1   | 1p13.2     | 0.327 | 2.86E-14 | 1.62E-12 |
| WDR11    | 10q26.12   | 0.326 | 2.96E-14 | 1.68E-12 |
| PPP4R2   | 3p13       | 0.326 | 3.00E-14 | 1.69E-12 |
| RBM47    | 4p14       | 0.326 | 3.01E-14 | 1.69E-12 |
| TMF1     | 3p14.1     | 0.326 | 3.09E-14 | 1.73E-12 |
| FBXL3    | 13q22.3    | 0.326 | 3.17E-14 | 1.76E-12 |
| RNF169   | 11q13.4    | 0.326 | 3.26E-14 | 1.81E-12 |
| WAPL     | 10q23.2    | 0.326 | 3.33E-14 | 1.84E-12 |
| RELCH    | 18q21.33   | 0.325 | 3.60E-14 | 1.97E-12 |
| AP4E1    | 15q21.2    | 0.325 | 3.70E-14 | 2.01E-12 |
| FBXW11   | 5q35.1     | 0.325 | 3.78E-14 | 2.05E-12 |
| SLC25A43 | Xq24       | 0.325 | 3.86E-14 | 2.09E-12 |
| CHAMP1   | 13q34      | 0.325 | 3.89E-14 | 2.10E-12 |
| TFDP1    | 13q34      | 0.325 | 4.04E-14 | 2.17E-12 |
| SEC24A   | 5q31.1     | 0.325 | 4.23E-14 | 2.26E-12 |
| SLC9A6   | Xq26.3     | 0.325 | 4.24E-14 | 2.26E-12 |
| HIPK3    | 11p13      | 0.325 | 4.29E-14 | 2.28E-12 |
| MFAP3    | 5q33.2     | 0.324 | 4.34E-14 | 2.29E-12 |
| ADNP2    | 18q23      | 0.324 | 4.34E-14 | 2.29E-12 |
| NOTCH2   | 1p12       | 0.324 | 4.82E-14 | 2.52E-12 |
| NUP58    | 13q12.13   | 0.324 | 4.96E-14 | 2.59E-12 |
| AFDN     | 6q27       | 0.323 | 5.35E-14 | 2.76E-12 |
| AMMECR1  | Xq23       | 0.323 | 5.64E-14 | 2.89E-12 |
| ZNF860   | 3p23-p22.3 | 0.322 | 6.28E-14 | 3.21E-12 |

Table S2. The top 200 genes negatively correlated with *SPIN4*.

| Correlated Gene | Cytoband       | Spearman's Correlation | p-Value  | q-Value  |
|-----------------|----------------|------------------------|----------|----------|
| PRR5            | 22q13.31       | -0.459                 | 2.93E-28 | 1.96E-24 |
| VPS37D          | 7q11.23        | -0.45                  | 4.77E-27 | 2.39E-23 |
| RAB6B           | 3q22.1         | -0.439                 | 1.10E-25 | 3.67E-22 |
| RHBDD3          | 22q12.2        | -0.438                 | 1.67E-25 | 4.18E-22 |
| DGCR6           | 22q11.21 22q11 | -0.434                 | 4.22E-25 | 9.40E-22 |
| PARL            | 3q27.1         | -0.415                 | 7.69E-23 | 8.11E-20 |
| MAPK12          | 22q13.33       | -0.412                 | 1.69E-22 | 1.54E-19 |
| SLC29A4         | 7p22.1         | -0.41                  | 2.81E-22 | 2.35E-19 |
| ST3GAL3         | 1p34.1         | -0.408                 | 4.51E-22 | 3.35E-19 |
| SHC2            | 19p13.3        | -0.407                 | 5.28E-22 | 3.78E-19 |
| RAB3IL1         | 11q12.2-q12.3  | -0.406                 | 6.52E-22 | 4.50E-19 |
| NCBP2AS2        | 3q29           | -0.405                 | 9.06E-22 | 5.86E-19 |
| COPZ2           | 17q21.32       | -0.404                 | 1.16E-21 | 7.26E-19 |
| ASPSCR1         | 17q25.3        | -0.401                 | 2.32E-21 | 1.33E-18 |
| SMARCD3         | 7q36.1         | -0.398                 | 5.08E-21 | 2.69E-18 |
| EGFL7           | 9q34.3         | -0.397                 | 6.94E-21 | 3.48E-18 |
| DPP7            | 9q34.3         | -0.396                 | 9.80E-21 | 4.57E-18 |
| TMEM9           | 1q32.1         | -0.393                 | 2.01E-20 | 8.59E-18 |

|          |          |        |          |          |
|----------|----------|--------|----------|----------|
| GLI4     | 8q24.3   | -0.391 | 3.07E-20 | 1.26E-17 |
| DIPK1B   | 9q34.3   | -0.391 | 3.22E-20 | 1.29E-17 |
| FLAD1    | 1q21.3   | -0.389 | 5.01E-20 | 1.86E-17 |
| PYCR2    | 1q42.12  | -0.388 | 5.94E-20 | 2.16E-17 |
| TP53I13  | 17q11.2  | -0.388 | 6.57E-20 | 2.35E-17 |
| FTH1     | 11q12.3  | -0.387 | 8.42E-20 | 2.96E-17 |
| TNK2     | 3q29     | -0.386 | 9.95E-20 | 3.38E-17 |
| IFT27    | 22q12.3  | -0.386 | 1.03E-19 | 3.45E-17 |
| MRPL55   | 1q42.13  | -0.385 | 1.16E-19 | 3.83E-17 |
| ZNF771   | 16p11.2  | -0.385 | 1.21E-19 | 3.93E-17 |
| TMEM121  | 14q32.33 | -0.383 | 2.09E-19 | 6.36E-17 |
| ALG3     | 3q27.1   | -0.381 | 2.75E-19 | 8.00E-17 |
| NUDT14   | 14q32.33 | -0.381 | 2.83E-19 | 8.11E-17 |
| ARHGEF25 | 12q13.3  | -0.381 | 2.92E-19 | 8.18E-17 |
| INAFM1   | 19q13.32 | -0.38  | 3.85E-19 | 1.03E-16 |
| NPDC1    | 9q34.3   | -0.378 | 6.29E-19 | 1.58E-16 |
| SLC22A17 | 14q11.2  | -0.377 | 7.77E-19 | 1.88E-16 |
| MAGED4   | Xp11.22  | -0.377 | 8.48E-19 | 2.00E-16 |
| SSR2     | 1q22     | -0.376 | 9.15E-19 | 2.13E-16 |
| ZNF579   | 19q13.42 | -0.376 | 9.63E-19 | 2.22E-16 |
| ETFB     | 19q13.41 | -0.376 | 9.95E-19 | 2.27E-16 |
| FAAP20   | 1p36.33  | -0.376 | 1.08E-18 | 2.43E-16 |
| DGCR6L   | 22q11.21 | -0.373 | 1.79E-18 | 3.95E-16 |
| SAT2     | 17p13.1  | -0.372 | 2.21E-18 | 4.76E-16 |
| MZT2B    | 2q21.1   | -0.371 | 2.73E-18 | 5.76E-16 |
| NRSN2    | 20p13    | -0.371 | 3.12E-18 | 6.51E-16 |
| SMIM29   | 6p21.31  | -0.371 | 3.19E-18 | 6.54E-16 |
| NPAS1    | 19q13.32 | -0.371 | 3.20E-18 | 6.54E-16 |
| SWI5     | 9q34.11  | -0.37  | 3.43E-18 | 6.94E-16 |
| GSC      | 14q32.13 | -0.37  | 3.78E-18 | 7.57E-16 |
| TRAPPC6A | 19q13.32 | -0.37  | 4.15E-18 | 8.24E-16 |
| LIMS2    | 2q14.3   | -0.369 | 4.42E-18 | 8.52E-16 |
| LRFN1    | 19q13.2  | -0.369 | 5.10E-18 | 9.73E-16 |
| DUSP15   | 20q11.21 | -0.366 | 8.71E-18 | 1.58E-15 |
| GPC1     | 2q37.3   | -0.364 | 1.39E-17 | 2.42E-15 |
| CYHR1    | 8q24.3   | -0.363 | 1.63E-17 | 2.75E-15 |
| PRR7     | 5q35.3   | -0.363 | 1.87E-17 | 3.07E-15 |
| TTLL1    | 22q13.2  | -0.363 | 1.89E-17 | 3.08E-15 |
| CHCHD10  | 22q11.23 | -0.362 | 2.04E-17 | 3.27E-15 |
| NDUFB9   | 8q24.13  | -0.362 | 2.07E-17 | 3.27E-15 |
| LRP3     | 19q13.11 | -0.362 | 2.09E-17 | 3.27E-15 |
| GPR162   | 12p13.31 | -0.362 | 2.24E-17 | 3.49E-15 |
| COA6     | 1q42.2   | -0.362 | 2.39E-17 | 3.68E-15 |
| YDJC     | 22q11.21 | -0.361 | 2.58E-17 | 3.94E-15 |
| ABCF3    | 3q27.1   | -0.361 | 2.60E-17 | 3.94E-15 |
| SLC25A1  | 22q11.21 | -0.361 | 2.61E-17 | 3.94E-15 |
| ZDHHC1   | 16q22.1  | -0.361 | 2.87E-17 | 4.30E-15 |
| AP2M1    | 3q27.1   | -0.361 | 2.95E-17 | 4.34E-15 |
| RNF215   | 22q12.2  | -0.36  | 3.00E-17 | 4.39E-15 |
| MIF      | 22q11.23 | -0.36  | 3.05E-17 | 4.43E-15 |
| JAKMIP3  | 10q26.3  | -0.36  | 3.52E-17 | 4.94E-15 |

|          |          |        |          |          |
|----------|----------|--------|----------|----------|
| NENF     | 1q32.3   | -0.359 | 3.89E-17 | 5.38E-15 |
| USE1     | 19p13.11 | -0.359 | 4.36E-17 | 5.95E-15 |
| FTH1P3   | 2p23.3   | -0.359 | 4.55E-17 | 6.13E-15 |
| KIAA0930 | 22q13.31 | -0.358 | 5.39E-17 | 7.01E-15 |
| MLXIPL   | 7q11.23  | -0.358 | 5.59E-17 | 7.23E-15 |
| PANX2    | 22q13.33 | -0.357 | 6.49E-17 | 8.34E-15 |
| PRRX2    | 9q34.11  | -0.357 | 6.59E-17 | 8.38E-15 |
| MRPL24   | 1q23.1   | -0.356 | 8.29E-17 | 1.01E-14 |
| RFX8     | 2q11.2   | -0.355 | 9.31E-17 | 1.11E-14 |
| KRTCAP2  | 1q22     | -0.355 | 9.34E-17 | 1.11E-14 |
| SMYD3    | 1q44     | -0.355 | 9.73E-17 | 1.15E-14 |
| OSGIN1   | 16q23.3  | -0.355 | 9.77E-17 | 1.15E-14 |
| TMEM161A | 19p13.11 | -0.355 | 9.90E-17 | 1.15E-14 |
| ADSL     | 22q13.1  | -0.354 | 1.20E-16 | 1.38E-14 |
| FASTK    | 7q36.1   | -0.354 | 1.25E-16 | 1.44E-14 |
| ADGRB1   | 8q24.3   | -0.354 | 1.28E-16 | 1.46E-14 |
| BRSK1    | 19q13.42 | -0.354 | 1.33E-16 | 1.50E-14 |
| B4GALNT4 | 11p15.5  | -0.353 | 1.37E-16 | 1.54E-14 |
| GSTO1    | 10q25.1  | -0.353 | 1.43E-16 | 1.59E-14 |
| NGRN     | 15q26.1  | -0.353 | 1.62E-16 | 1.76E-14 |
| MRPL47   | 3q26.33  | -0.352 | 1.69E-16 | 1.83E-14 |
| SOX12    | 20p13    | -0.351 | 2.27E-16 | 2.40E-14 |
| CBX8     | 17q25.3  | -0.351 | 2.32E-16 | 2.44E-14 |
| PSD      | 10q24.32 | -0.351 | 2.45E-16 | 2.55E-14 |
| NAT14    | 19q13.42 | -0.35  | 2.73E-16 | 2.81E-14 |
| CDIPT    | 16p11.2  | -0.35  | 2.77E-16 | 2.83E-14 |
| LRRC23   | 12p13.31 | -0.35  | 2.78E-16 | 2.83E-14 |
| ARL8A    | 1q32.1   | -0.35  | 2.81E-16 | 2.84E-14 |
| LAMTOR4  | 7q22.1   | -0.35  | 2.93E-16 | 2.95E-14 |
| WBP1     | 2p13.1   | -0.349 | 3.27E-16 | 3.25E-14 |
| ADAMTS13 | 9q34.2   | -0.349 | 3.37E-16 | 3.33E-14 |
| PLD3     | 19q13.2  | -0.349 | 3.45E-16 | 3.39E-14 |
| PARVB    | 22q13.31 | -0.349 | 3.47E-16 | 3.40E-14 |
| ECE2     | 3q27.1   | -0.349 | 3.74E-16 | 3.62E-14 |
| PVT1     | 8q24.21  | -0.348 | 4.07E-16 | 3.84E-14 |
| C15ORF61 | 15q23    | -0.348 | 4.08E-16 | 3.84E-14 |
| C1ORF56  | 1q21.3   | -0.348 | 4.14E-16 | 3.88E-14 |
| NME4     | 16p13.3  | -0.347 | 4.61E-16 | 4.30E-14 |
| MAF1     | 8q24.3   | -0.347 | 4.83E-16 | 4.46E-14 |
| FAM118A  | 22q13.31 | -0.347 | 5.57E-16 | 5.10E-14 |
| ATRAID   | 2p23.3   | -0.346 | 5.68E-16 | 5.17E-14 |
| DTX3     | 12q13.3  | -0.346 | 5.86E-16 | 5.31E-14 |
| HTRA3    | 4p16.1   | -0.346 | 6.34E-16 | 5.70E-14 |
| C1QTNF12 | 1p36.33  | -0.345 | 7.31E-16 | 6.51E-14 |
| SYNDIG1  | 20p11.21 | -0.345 | 7.79E-16 | 6.88E-14 |
| SELENOM  | 22q12.2  | -0.345 | 8.39E-16 | 7.31E-14 |
| DDIT3    | 12q13.3  | -0.344 | 9.91E-16 | 8.49E-14 |
| ZDHHC24  | 11q13.2  | -0.343 | 1.15E-15 | 9.70E-14 |
| NECAB2   | 16q23.3  | -0.343 | 1.22E-15 | 1.01E-13 |
| FBRSL1   | 12q24.33 | -0.343 | 1.24E-15 | 1.02E-13 |
| MSI1     | 12q24.31 | -0.343 | 1.24E-15 | 1.02E-13 |



|                  |                |        |          |                 |
|------------------|----------------|--------|----------|-----------------|
| <b>SMARCB1</b>   | 22q11.23 22q11 | -0.342 | 1.28E-15 | <b>1.04E-13</b> |
| <b>CLEC11A</b>   | 19q13.33       | -0.342 | 1.33E-15 | <b>1.08E-13</b> |
| <b>TNFRSF18</b>  | 1p36.33        | -0.342 | 1.42E-15 | <b>1.14E-13</b> |
| <b>NUMBL</b>     | 19q13.2        | -0.342 | 1.45E-15 | <b>1.16E-13</b> |
| <b>ZNF580</b>    | 19q13.42       | -0.342 | 1.46E-15 | <b>1.17E-13</b> |
| <b>POLR2F</b>    | 22q13.1        | -0.342 | 1.49E-15 | <b>1.19E-13</b> |
| <b>B4GALT7</b>   | 5q35.3         | -0.341 | 1.57E-15 | <b>1.25E-13</b> |
| <b>P3H3</b>      | 12p13.31       | -0.341 | 1.62E-15 | <b>1.28E-13</b> |
| <b>FTL</b>       | 19q13.33       | -0.341 | 1.84E-15 | <b>1.43E-13</b> |
| <b>C12ORF57</b>  | 12p13.31       | -0.34  | 2.03E-15 | <b>1.56E-13</b> |
| <b>SELENOO</b>   | 22q13.33       | -0.34  | 2.09E-15 | <b>1.61E-13</b> |
| <b>CDPF1</b>     | 22q13.31       | -0.34  | 2.18E-15 | <b>1.67E-13</b> |
| <b>BUD23</b>     | 7q11.23        | -0.339 | 2.46E-15 | <b>1.87E-13</b> |
| <b>ZNF358</b>    | 19p13.2        | -0.339 | 2.50E-15 | <b>1.89E-13</b> |
| <b>ATXN10</b>    | 22q13.31       | -0.337 | 3.58E-15 | <b>2.61E-13</b> |
| <b>TPRA1</b>     | 3q21.3         | -0.337 | 3.60E-15 | <b>2.62E-13</b> |
| <b>NAGLU</b>     | 17q21.2        | -0.337 | 3.72E-15 | <b>2.69E-13</b> |
| <b>MAP6D1</b>    | 3q27.1         | -0.337 | 3.94E-15 | <b>2.84E-13</b> |
| <b>POLR2H</b>    | 3q27.1         | -0.337 | 3.96E-15 | <b>2.85E-13</b> |
| <b>MFRP</b>      | 11q23.3        | -0.337 | 4.01E-15 | <b>2.86E-13</b> |
| <b>TOP1MT</b>    | 8q24.3         | -0.337 | 4.13E-15 | <b>2.92E-13</b> |
| <b>PACS2</b>     | 14q32.33       | -0.336 | 4.26E-15 | <b>3.00E-13</b> |
| <b>GRP</b>       | 18q21.32       | -0.336 | 4.43E-15 | <b>3.09E-13</b> |
| <b>TTC28-AS1</b> | 22q12.1        | -0.336 | 4.43E-15 | <b>3.09E-13</b> |
| <b>ADRA2C</b>    | 4p16.3         | -0.336 | 4.67E-15 | <b>3.24E-13</b> |
| <b>INHBE</b>     | 12q13.3        | -0.336 | 4.70E-15 | <b>3.25E-13</b> |
| <b>TCEA2</b>     | 20q13.33       | -0.335 | 5.22E-15 | <b>3.57E-13</b> |
| <b>JTB</b>       | 1q21.3         | -0.335 | 6.05E-15 | <b>4.08E-13</b> |
| <b>RTN4R</b>     | 22q11.21       | -0.334 | 6.34E-15 | <b>4.25E-13</b> |
| <b>RNF112</b>    | 17p11.2        | -0.334 | 6.40E-15 | <b>4.28E-13</b> |
| <b>PEMT</b>      | 17p11.2        | -0.334 | 6.98E-15 | <b>4.64E-13</b> |
| <b>SRRM3</b>     | 7q11.23        | -0.334 | 7.22E-15 | <b>4.76E-13</b> |
| <b>DDT</b>       | 22q11.23       | -0.334 | 7.25E-15 | <b>4.76E-13</b> |
| <b>EVA1B</b>     | 1p34.3         | -0.334 | 7.29E-15 | <b>4.78E-13</b> |
| <b>GABARAPL1</b> | 12p13.2        | -0.334 | 7.35E-15 | <b>4.80E-13</b> |
| <b>ANAPC11</b>   | 17q25.3        | -0.334 | 7.38E-15 | <b>4.80E-13</b> |
| <b>POMC</b>      | 2p23.3         | -0.333 | 7.80E-15 | <b>5.06E-13</b> |
| <b>ENDOV</b>     | 17q25.3        | -0.333 | 7.90E-15 | <b>5.11E-13</b> |
| <b>FAHD2CP</b>   | 2q11.2         | -0.333 | 8.04E-15 | <b>5.18E-13</b> |
| <b>RHBDD2</b>    | 7q11.23        | -0.333 | 8.16E-15 | <b>5.24E-13</b> |
| <b>RNF7</b>      | 3q23           | -0.333 | 8.27E-15 | <b>5.30E-13</b> |
| <b>PLCB4</b>     | 20p12.3-p12.2  | -0.333 | 9.21E-15 | <b>5.79E-13</b> |
| <b>SLC38A10</b>  | 17q25.3        | -0.332 | 9.93E-15 | <b>6.22E-13</b> |
| <b>NAXE</b>      | 1q22           | -0.331 | 1.15E-14 | <b>7.19E-13</b> |
| <b>CD27-AS1</b>  | 12p13.31       | -0.331 | 1.22E-14 | <b>7.53E-13</b> |
| <b>PCGF1</b>     | 2p13.1         | -0.331 | 1.32E-14 | <b>8.07E-13</b> |
| <b>TSPAN7</b>    | Xp11.4         | -0.331 | 1.35E-14 | <b>8.24E-13</b> |
| <b>PALM</b>      | 19p13.3        | -0.33  | 1.41E-14 | <b>8.54E-13</b> |
| <b>TMEM158</b>   | 3p21.31        | -0.33  | 1.41E-14 | <b>8.54E-13</b> |
| <b>CCL26</b>     | 7q11.23        | -0.33  | 1.58E-14 | <b>9.48E-13</b> |
| <b>THBS3</b>     | 1q22           | -0.329 | 1.84E-14 | <b>1.10E-12</b> |

|                     |          |        |          |                 |
|---------------------|----------|--------|----------|-----------------|
| <b>PKN1</b>         | 19p13.12 | -0.329 | 1.86E-14 | <b>1.10E-12</b> |
| <b>RNF187</b>       | 1q42.13  | -0.329 | 1.91E-14 | <b>1.13E-12</b> |
| <b>GADD45G</b>      | 9q22.2   | -0.329 | 1.97E-14 | <b>1.15E-12</b> |
| <b>MDP1</b>         | 14q12    | -0.327 | 2.72E-14 | <b>1.56E-12</b> |
| <b>THOC5</b>        | 22q12.2  | -0.327 | 2.80E-14 | <b>1.59E-12</b> |
| <b>PRKCSH</b>       | 19p13.2  | -0.326 | 3.01E-14 | <b>1.69E-12</b> |
| <b>CRELD2</b>       | 22q13.33 | -0.326 | 3.12E-14 | <b>1.74E-12</b> |
| <b>THAP7</b>        | 22q11.21 | -0.326 | 3.20E-14 | <b>1.78E-12</b> |
| <b>INSYN1</b>       | 15q24.1  | -0.326 | 3.33E-14 | <b>1.84E-12</b> |
| <b>SEM1</b>         | 7q21.3   | -0.326 | 3.40E-14 | <b>1.87E-12</b> |
| <b>RAB34</b>        | 17q11.2  | -0.326 | 3.48E-14 | <b>1.90E-12</b> |
| <b>CCDC102A</b>     | 16q21    | -0.325 | 3.85E-14 | <b>2.08E-12</b> |
| <b>ELFN1</b>        | 7p22.3   | -0.325 | 4.08E-14 | <b>2.19E-12</b> |
| <b>CNPY3</b>        | 6p21.1   | -0.324 | 4.32E-14 | <b>2.29E-12</b> |
| <b>MXRA8</b>        | 1p36.33  | -0.324 | 4.63E-14 | <b>2.43E-12</b> |
| <b>MYL9</b>         | 20q11.23 | -0.324 | 4.69E-14 | <b>2.46E-12</b> |
| <b>SLC2A11</b>      | 22q11.23 | -0.324 | 4.70E-14 | <b>2.46E-12</b> |
| <b>PDE9A</b>        | 21q22.3  | -0.324 | 5.03E-14 | <b>2.61E-12</b> |
| <b>TMEM240</b>      | 1p36.33  | -0.324 | 5.04E-14 | <b>2.61E-12</b> |
| <b>BRI3</b>         | 7q21.3   | -0.323 | 5.28E-14 | <b>2.73E-12</b> |
| <b>GRASP</b>        | 12q13.13 | -0.323 | 5.59E-14 | <b>2.87E-12</b> |
| <b>METTL26</b>      | 16p13.3  | -0.322 | 6.47E-14 | <b>3.27E-12</b> |
| <b>SNF8</b>         | 17q21.32 | -0.322 | 6.82E-14 | <b>3.44E-12</b> |
| <b>UFSP1</b>        | 7q22.1   | -0.322 | 6.99E-14 | <b>3.51E-12</b> |
| <b>TANGO2</b>       | 22q11.21 | -0.322 | 7.00E-14 | <b>3.51E-12</b> |
| <b>SMIM7</b>        | 19p13.11 | -0.322 | 7.02E-14 | <b>3.51E-12</b> |
| <b>TMEM74B</b>      | 20p13    | -0.322 | 7.18E-14 | <b>3.58E-12</b> |
| <b>MCRIP2</b>       | 16p13.3  | -0.322 | 7.23E-14 | <b>3.60E-12</b> |
| <b>MAPKAPK5-AS1</b> | 12q24.12 | -0.321 | 8.46E-14 | <b>4.17E-12</b> |
